# Supplementary material for: The perplexing role of RAGE in pulmonary fibrosis: causality or casualty?
Source: PubMed Central journal article supplement — Ther Adv Respir Dis. 2021 Jul 18;15:17534666211016071. doi: 10.1177/17534666211016071 (PMC8293846; doi:10.1177/17534666211016071), 2021-07-18
Supplement: sj-pdf-4-tar-10.1177_17534666211016071.pdf [file sj-pdf-4-tar-10.1177_17534666211016071.pdf]

Reviewer 3 v.1

Comments to the Author

A very well written and comprehensive review on the role of RAGE in the pathophysiology of IPF. The concept of progressive fibrotic ILD such as rheumatoid arthritis and systemic sclerosis, is starting to be recognised where their clinical behaviour are very similar to IPF. Are there any data available on RAGE levels on such ILD cases and are they any different from IPF?
